# Supplementary material
Source: HighWire-hosted journal article supplement (https://bmjopen.bmj.com/content/13/11/e069811)
Supplement: inline-supplementary-material-1 [file inline-supplementary-material-1.pdf]

## Supplementary Material

**Table A, Missing values in the variables and the imputation methods**

|                        | SSNAP       |                   | Riksstroke (in-hospital mortality) |                                                                       |
|------------------------|-------------|-------------------|------------------------------------|-----------------------------------------------------------------------|
|                        | Missing (%) | Imputation method | Missing (%)                        | Imputation method                                                     |
| Age groups             | -           | -                 | -                                  | -                                                                     |
| Male                   | -           | -                 | -                                  | -                                                                     |
| Hypertension           | -           | -                 | 0.5%                               | Multiple imputation                                                   |
| AF                     | -           | -                 | 0.2%                               | Multiple imputation                                                   |
| Diabetes               | -           | -                 | 0.3%                               | Multiple imputation                                                   |
| Previous Stroke or TIA | -           | -                 | 0.3%                               | Multiple imputation                                                   |
| NIHSS at arrival       | -           | -                 | 42.9%                              | Not used in the model                                                 |
| Level of consciousness | -           | -                 | 1.5%                               | Multiple imputation after splitting the non alert level to two levels |
| Pre-stroke mRS         |             |                   | 5.0%                               | multiple imputation                                                   |

|                                       |       |                           |   |   |
|---------------------------------------|-------|---------------------------|---|---|
| anticoagulation prior to stroke if AF | 58.9% | Unknown as a new category | - | - |
| Type of stroke                        | 0.7%  | Unknown as a new category | - | - |

Abbreviation: AF: Atrial Fibrillation; TIA: transient ischaemic attack; NIHSS: National Institutes of Health Stroke Scale; mRS: modified Rankin Scale.

**Table B: Brier score, AUC with 95% Confidence Interval (CI) for SSNAP development set and internal validation set.**

|                                           | Brier score (95% CI)  |                    |                      |                      | AUC (95% CI)          |                      |
|-------------------------------------------|-----------------------|--------------------|----------------------|----------------------|-----------------------|----------------------|
|                                           | SSNAP development set |                    | SSNAP validation set |                      | SSNAP development set | SSNAP validation set |
| LR                                        | 0.081 (0.080, 0.082)  | 0.079 (0.78, 0.81) | 0.843 (0.841, 0.845) | 0.845 (0.841, 0.849) |                       |                      |
| LR with elastic net and interaction terms | 0.080 (0.079, 0.081)  | 0.078 (0.77, 0.80) | 0.845 (0.843, 0.847) | 0.848 (0.844, 0.851) |                       |                      |
| XGBoost                                   | 0.079 (0.079, 0.080)  | 0.078 (0.77, 0.79) | 0.848 (0.846, 0.850) | 0.849 (0.845, 0.853) |                       |                      |

**Table C, Brier score, AUC with 95% Confidence Interval (CI) for 2019 temporal validation and RiksStroke external validation with in-hospital mortality and all mortality.**

|                                                       | Brier score (95% CI)        |                                          |                                  | AUC (95% CI)               |                                          |                                  |
|-------------------------------------------------------|-----------------------------|------------------------------------------|----------------------------------|----------------------------|------------------------------------------|----------------------------------|
|                                                       | SSNAP                       | RiksStroke<br>(in-hospital<br>mortality) | RiksStroke<br>(all<br>mortality) | SSNAP                      | RiksStroke<br>(in-hospital<br>mortality) | RiksStroke<br>(all<br>mortality) |
| LR                                                    | 0.078<br>(0.076,<br>0.080)  | 0.066<br>(0.065,<br>0.067)               | 0.076<br>(0.075,<br>0.077)       | 0.847<br>(0.841,<br>0.853) | 0.861<br>(0.857,<br>0.864)               | 0.859<br>(0.856,<br>0.862)       |
| LR with<br>elastic net<br>and<br>interaction<br>terms | 0.078<br>(0.076,<br>0.080)  | 0.067<br>(0.066,<br>0.068)               | 0.077<br>(0.076,<br>0.078)       | 0.850<br>(0.844,<br>0.856) | 0.862<br>(0.859,<br>0.866)               | 0.861<br>(0.858,<br>0.864)       |
| XGBoost                                               | 0.077<br>(0.075 ,0.07<br>9) | 0.066<br>(0.065,<br>0.067)               | 0.077<br>(0.076,<br>0.078)       | 0.852<br>(0.846,<br>0.858) | 0.861<br>(0.858,<br>0.865)               | 0.860<br>(0.857,<br>0.863)       |

**Table D, the coefficients of variables from logistic regression**

| Variables             | Coefficients |
|-----------------------|--------------|
| loss of consciousness | 1.26         |

|                                          |              |
|------------------------------------------|--------------|
| <b>type of stroke Haemorrhage</b>        | <b>0.92</b>  |
| <b>Inpatient at time of stroke</b>       | <b>0.47</b>  |
| <b>atrial fibrillation</b>               | <b>0.46</b>  |
| <b>type of stroke Unknown</b>            | <b>0.32</b>  |
| <b>Age (Groups by 5)</b>                 | <b>0.22</b>  |
| <b>hour of admission 04 to 08</b>        | <b>0.17</b>  |
| <b>previous stroke/TIA</b>               | <b>-0.16</b> |
| <b>prestroke mRS</b>                     | <b>0.16</b>  |
| <b>hour of admission 12 to 16</b>        | <b>-0.14</b> |
| <b>hypertension</b>                      | <b>-0.12</b> |
| <b>Male</b>                              | <b>0.11</b>  |
| <b>admission Friday</b>                  | <b>-0.10</b> |
| <b>diabetes</b>                          | <b>0.10</b>  |
| <b>hour of admission 16 to 20</b>        | <b>-0.09</b> |
| <b>admission Monday</b>                  | <b>-0.08</b> |
| <b>prior anticoagulation if AF Nobut</b> | <b>0.07</b>  |
| <b>admission Tuesday</b>                 | <b>-0.05</b> |
| <b>admission Wednesday</b>               | <b>-0.05</b> |

|                                            |               |
|--------------------------------------------|---------------|
| <b>admission Thursday</b>                  | <b>-0.05</b>  |
| <b>admission Saturday</b>                  | <b>-0.03</b>  |
| <b>hour of admission 08 to 12</b>          | <b>-0.03</b>  |
| <b>prior anticoagulation if AF Yes</b>     | <b>-0.02</b>  |
| <b>hour of admission 20 to 24</b>          | <b>0.02</b>   |
| <b>prior anticoagulation if AF Unknown</b> | <b>-0.005</b> |

Abbreviation: AF: Atrial Fibrillation; TIA: transient ischaemic attack; mRS: modified Rankin Scale.

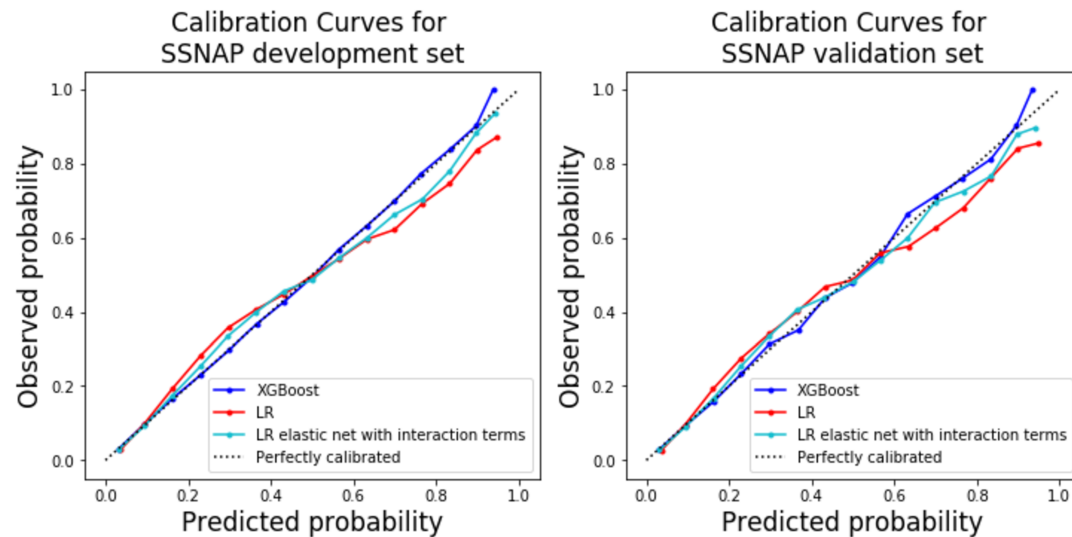

**Figure A: Calibration curves for all models on development set and validation set of SSNAP cohort.**

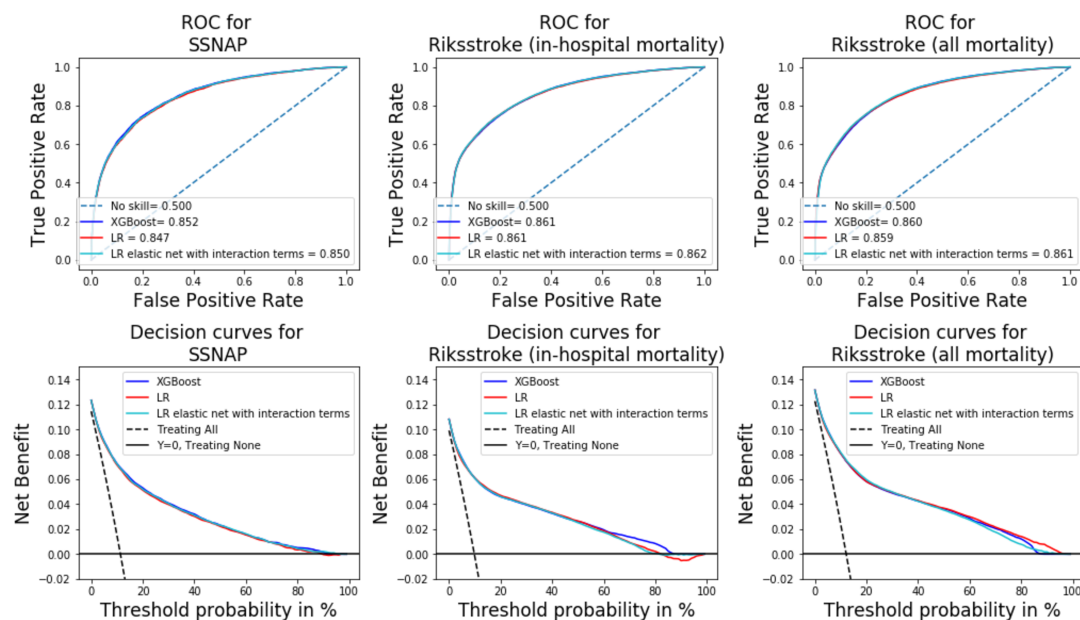

**Figure B: ROC and decision curves for all models on 2019 temporal validation of SSNAP cohort (left) and external validation using Riksstroke with in-hospital mortality (middle) and all mortality (right)**

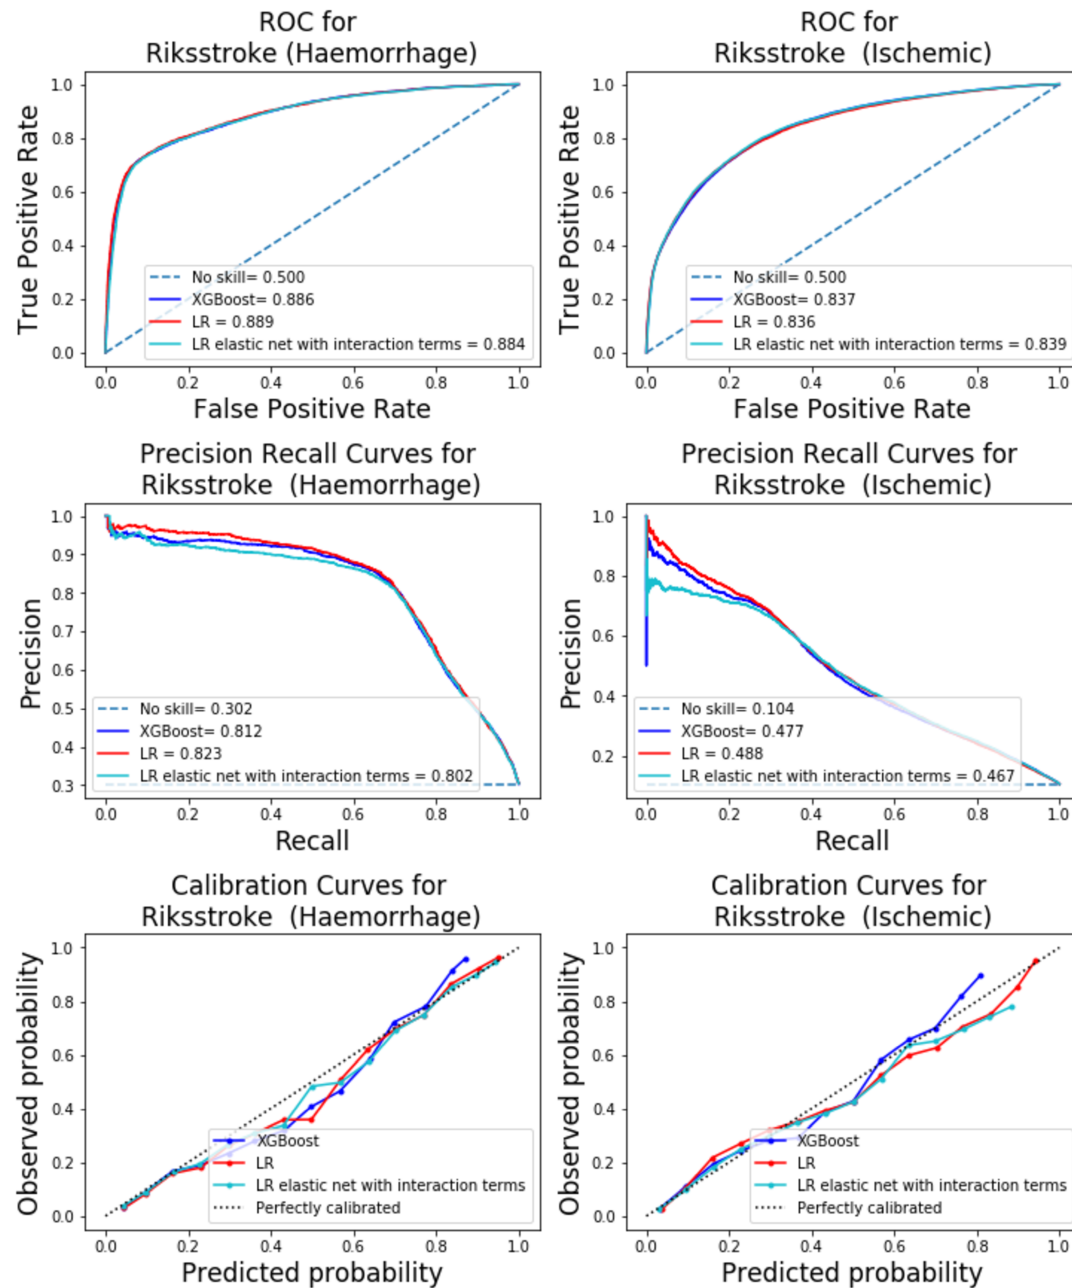

**Figure C: AUC-ROC, PR-curve, and Calibration-curve for all mortalities (Haemorrhage (left) vs Ischemic (right) patients) in Riksstroke**

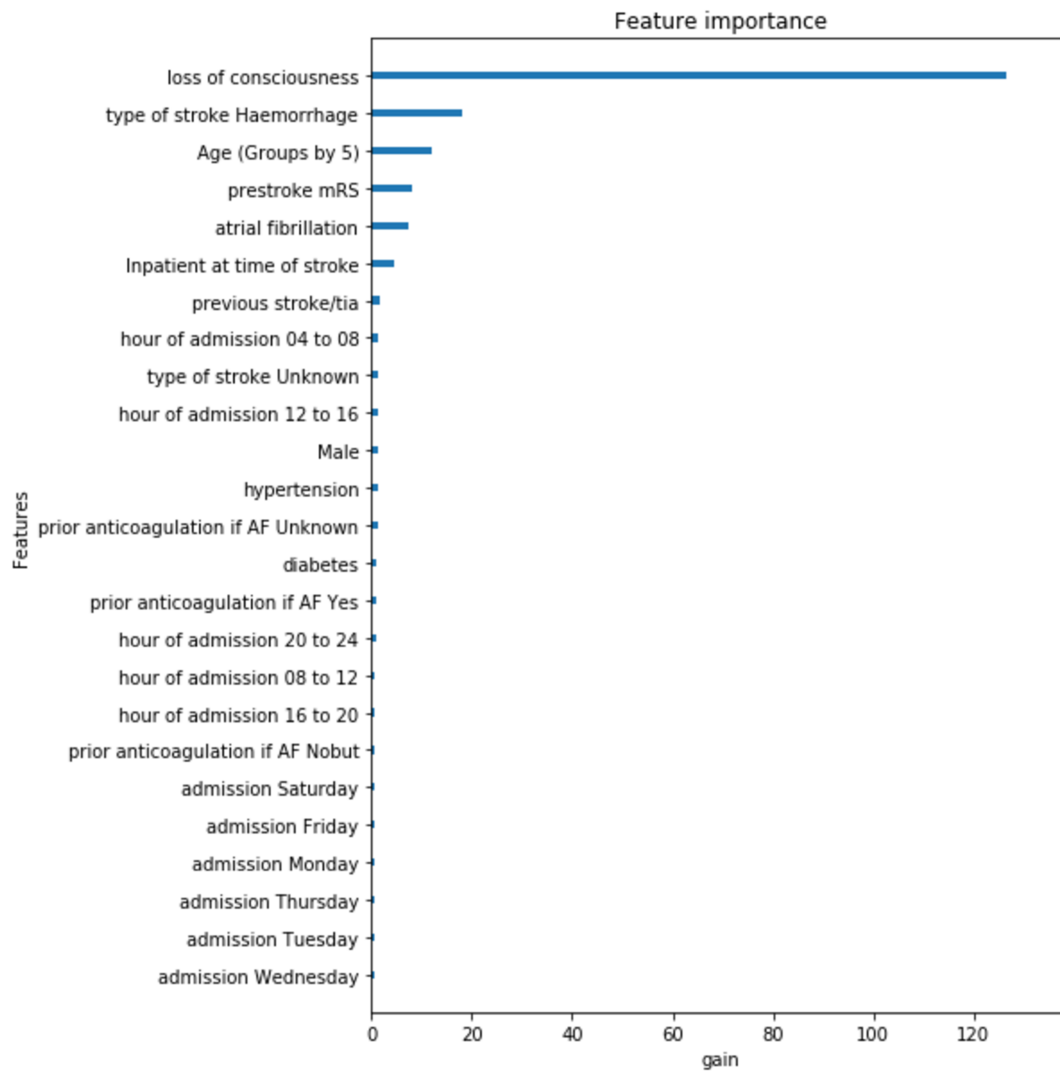

**Figure D: Feature importance from XGBoost using gain as measurement of feature importance**
